# Supplementary material for: Detection of recurrent copy number alterations in the genome: taking among-subject heterogeneity seriously
Source: Springer Nature journal article supplement (doi:10.1186/1471-2105-10-308), 2009-09-23

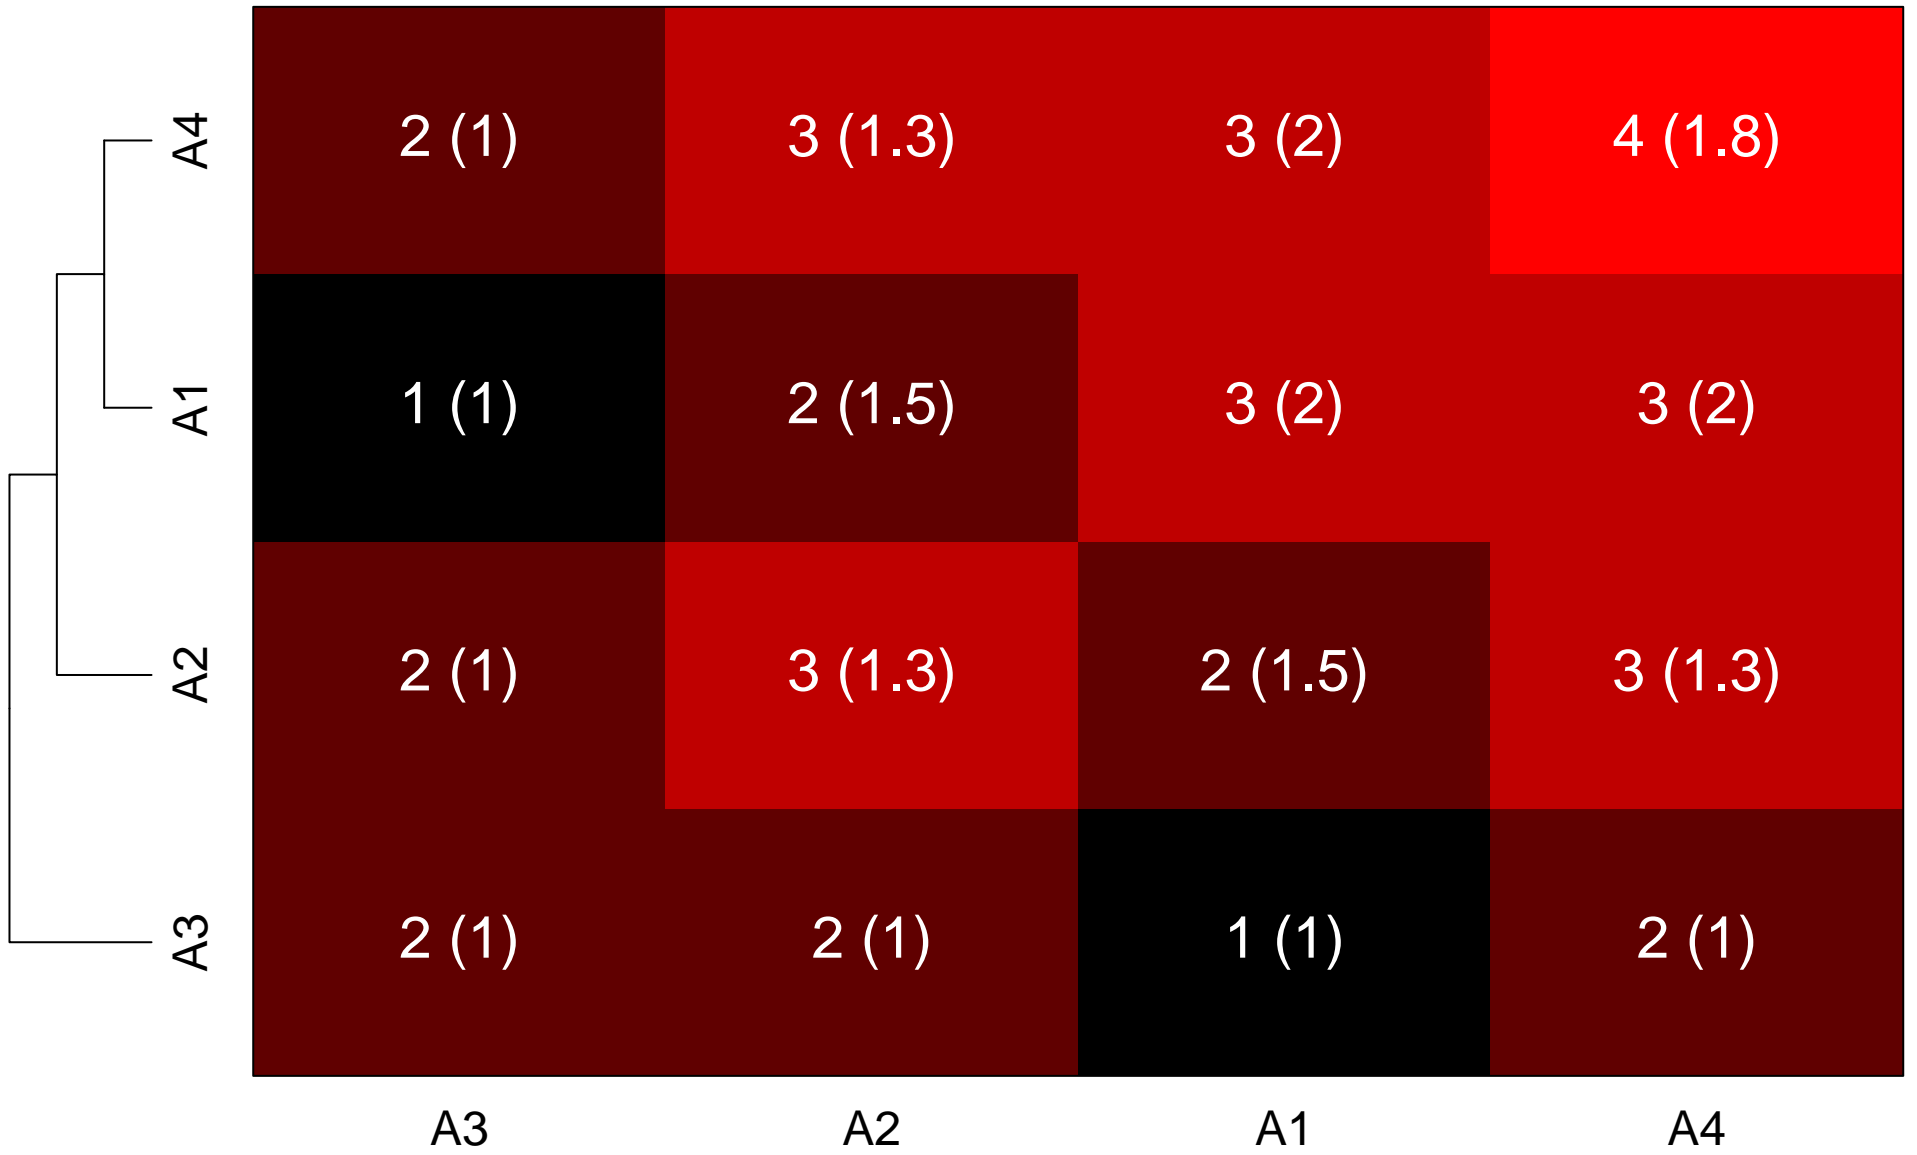

Supplement: 12859_2009_3038_MOESM3_ESM.pdf [file 12859_2009_3038_MOESM3_ESM.pdf]
